# Supplementary material for: Acetylenic cyclodextrins for multireceptor architectures: cups with sticky ends for the formation of extension wires and junctions
Source: Royal Society of Chemistry journal article supplement (doi:10.1039/b508607h), 2005-01-01
Supplement: b508607h-1.pdf [file b508607h-1.pdf]

Supporting Information

**“Acetylenic cyclodextrins for multireceptor architectures:  
cups with sticky ends for the formation of extension wires and junctions”**

*Jonathan A Faiz, Neil Spencer and Zoe Pikramenou\**

School of Chemistry, The University of Birmingham, Edgbaston, B15 2TT, UK.

[z.pikramenou@bham.ac.uk](mailto:z.pikramenou@bham.ac.uk)

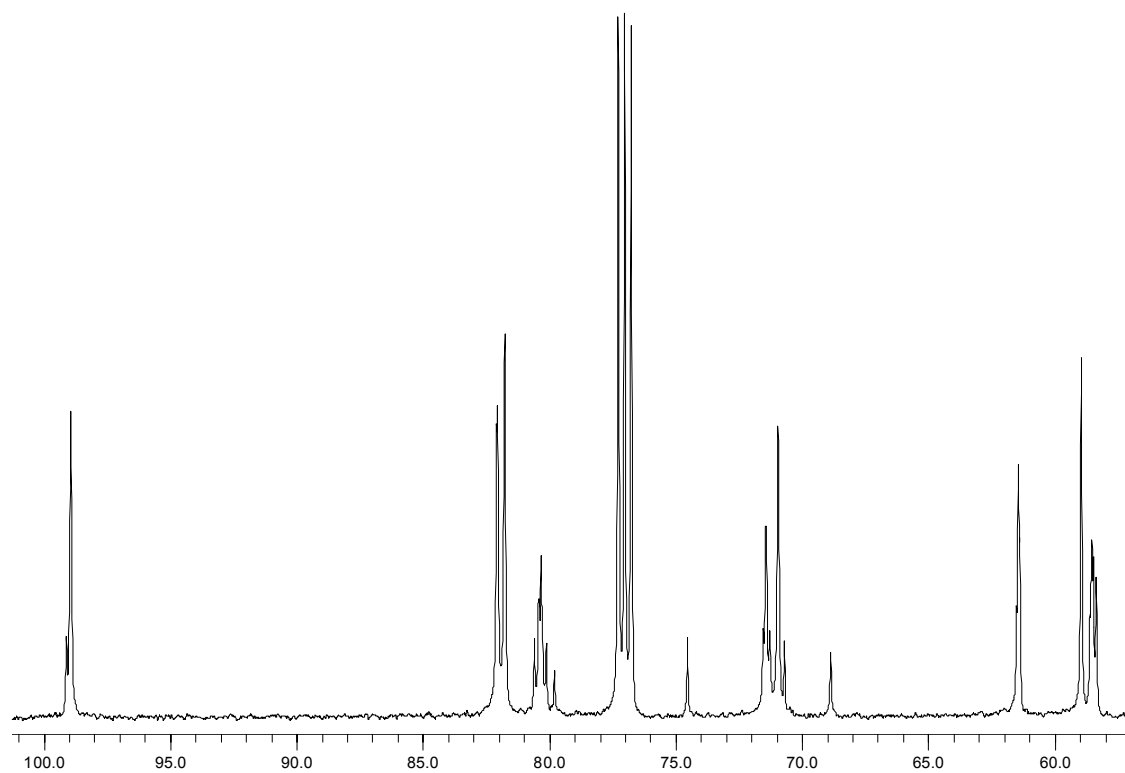

**Figure SM1.** 125 MHz  $^{13}\text{C}$  NMR spectrum of **3** ( $\text{CDCl}_3$ ).

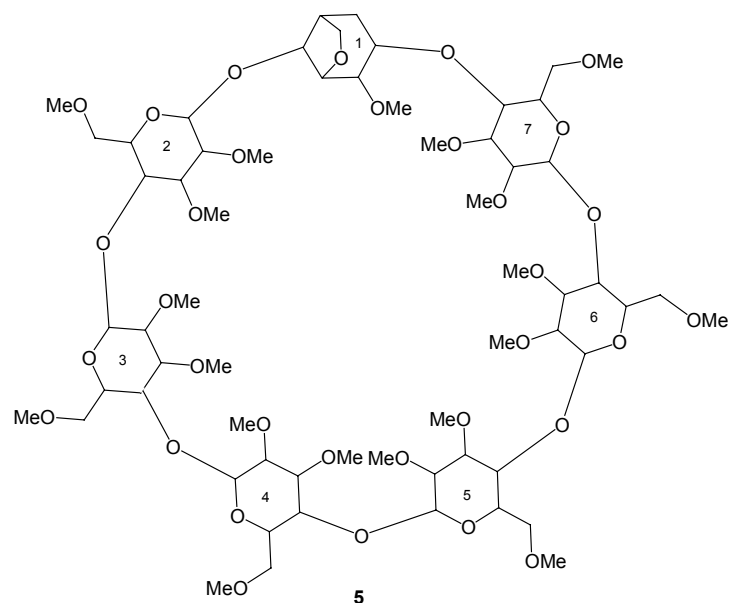

**Figure SM2.** Structural representation of **5**.

| Ring | H-1  | H-2  | H3   | H-4   | H-5  | H-6           | 2-OMe | 3-OMe | 6-OMe |
|------|------|------|------|-------|------|---------------|-------|-------|-------|
| 1    | 5.26 | 3.53 | 4.57 | 3.85  | 4.38 | 4.09,<br>3.85 | 3.51  | -     | -     |
| 2    | 4.89 | 3.21 | 3.50 | 3.75  | 4.14 | 3.95,<br>3.52 | 3.45  | 3.60  | 3.33  |
| 3    | 5.19 | 3.21 | 3.58 | 3.78  | 3.83 | 3.72,<br>3.42 | 3.47  | 3.54  | 3.27  |
| 4    | 5.53 | 3.14 | 3.57 | 3.63  | 3.57 | 3.91,<br>3.52 | 3.47  | 3.67  | 3.34  |
| 5    | 5.05 | 3.14 | 3.53 | 3.58  | 3.71 | 3.85,<br>3.53 | 3.49  | 3.63  | 3.33  |
| 6    | 4.98 | 3.12 | 3.42 | 3.53  | 3.67 | 3.93,<br>3.47 | 3.44  | 3.57  | 3.34  |
| 7    | 5.02 | 3.13 | 3.58 | 3.463 | 3.94 | 3.73,<br>3.53 | 3.44  | 3.56  | 3.39  |

**Table SM1.**  $^1\text{H}$  shifts of **5** ( $\text{CDCl}_3$ ).

| Ring | C-1   | C-2  | C3   | C-4  | C-5  | C-6  | 2-OMe           | 3-OMe | 6-OMe           |
|------|-------|------|------|------|------|------|-----------------|-------|-----------------|
| 1    | 100.1 | 77.3 | 71.5 | 79.2 | 73.3 | 69.3 | 58.2            | -     | -               |
| 2    | 98.0  | 82.5 | 82.4 | 79.3 | 71.0 | 71.1 | 58.4            | 61.3  | 58.8            |
| 3    | 97.7  | 81.9 | 82.9 | 73.3 | 70.2 | 71.0 | 59.0 or<br>57.9 | 60.0  | 58.6            |
| 4    | 96.7  | 81.7 | 81.6 | 81.5 | 71.0 | 70.9 | 59.0 or<br>57.9 | 61.8  | 59.0 or<br>58.9 |
| 5    | 99.2  | 81.8 | 81.6 | 81.6 | 71.5 | 71.1 | 59.1            | 61.9  | 58.8            |
| 6    | 99.0  | 81.9 | 81.6 | 81.7 | 71.2 | 70.9 | 57.8 or<br>57.7 | 61.2  | 59.0 or<br>58.9 |
| 7    | 99.7  | 82.8 | 82.2 | 79.3 | 70.4 | 71.5 | 3.44            | 61.7  | 59.1            |

**Table SM2.**  $^{13}\text{C}$  shifts of **5** ( $\text{CDCl}_3$ ).

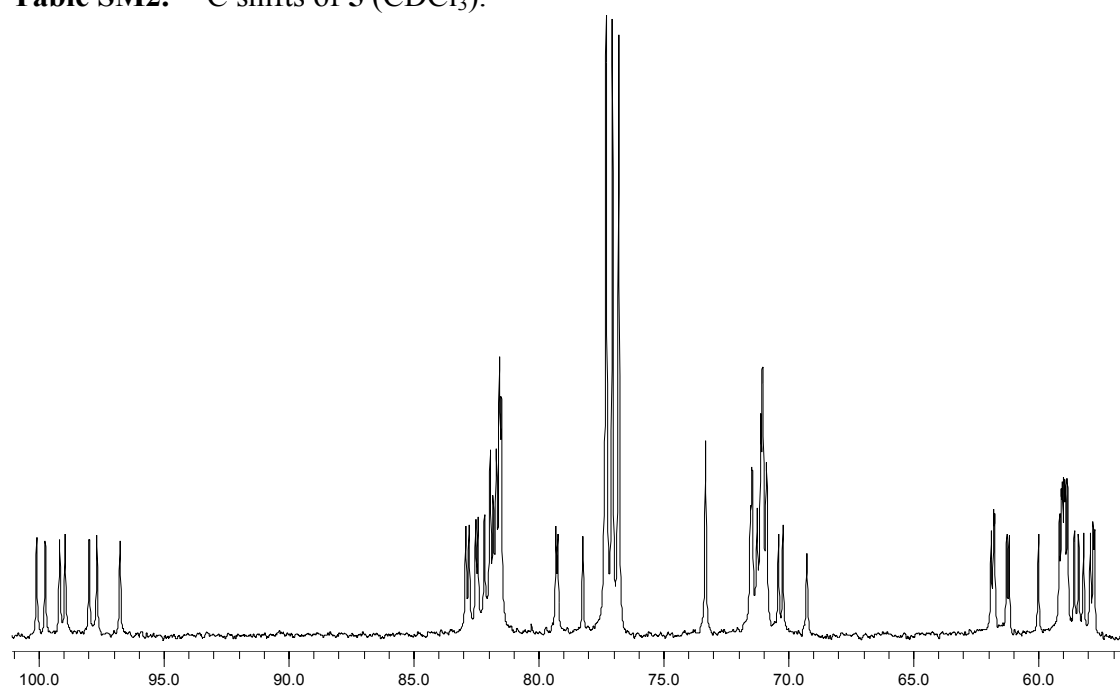

**Figure SM3.** 125 MHz  $^{13}\text{C}$  NMR spectrum of **5** ( $\text{CDCl}_3$ ).

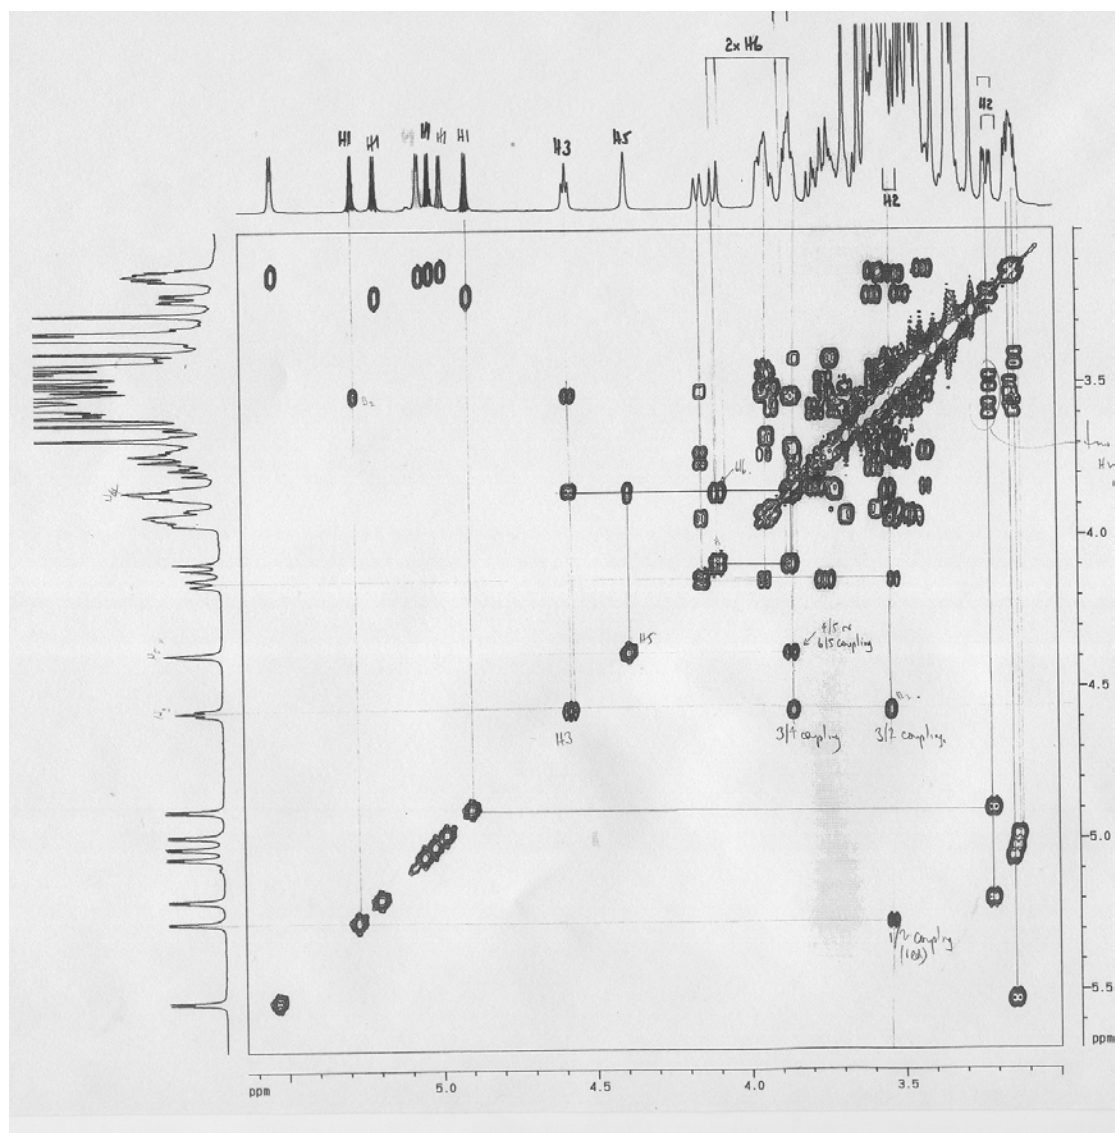

**Figure SM4.** COSY spectrum of **5** ( $\text{CDCl}_3$ ).



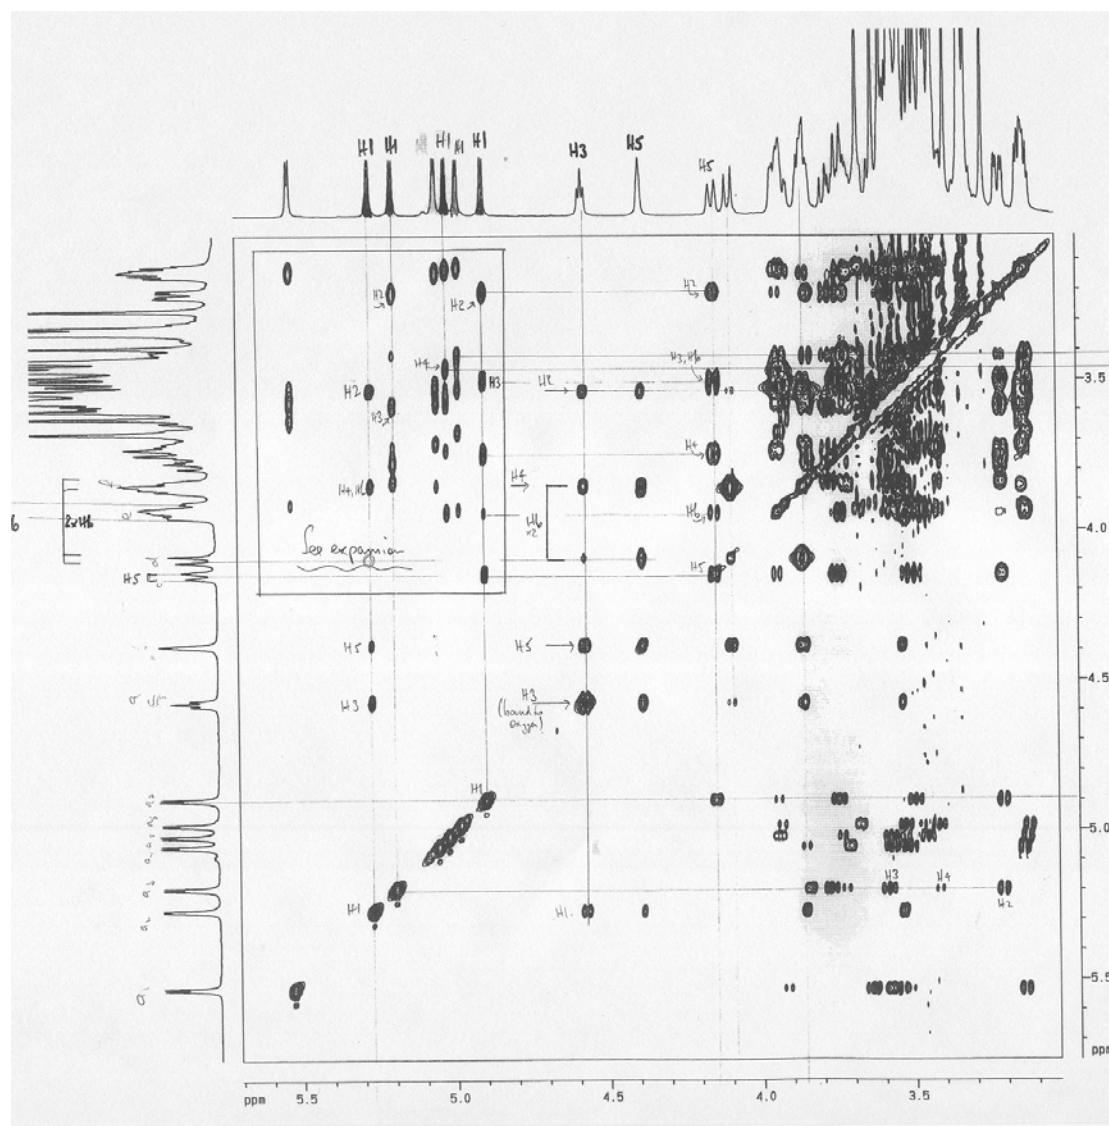

Figure SM6. HOHAHA spectrum of **5** ( $\text{CDCl}_3$ ).

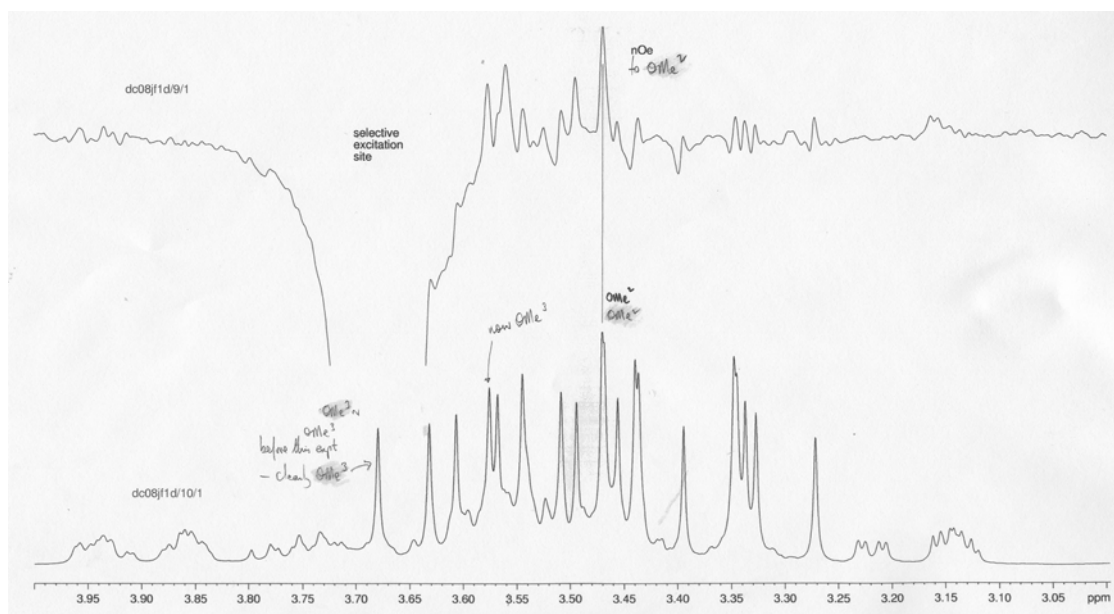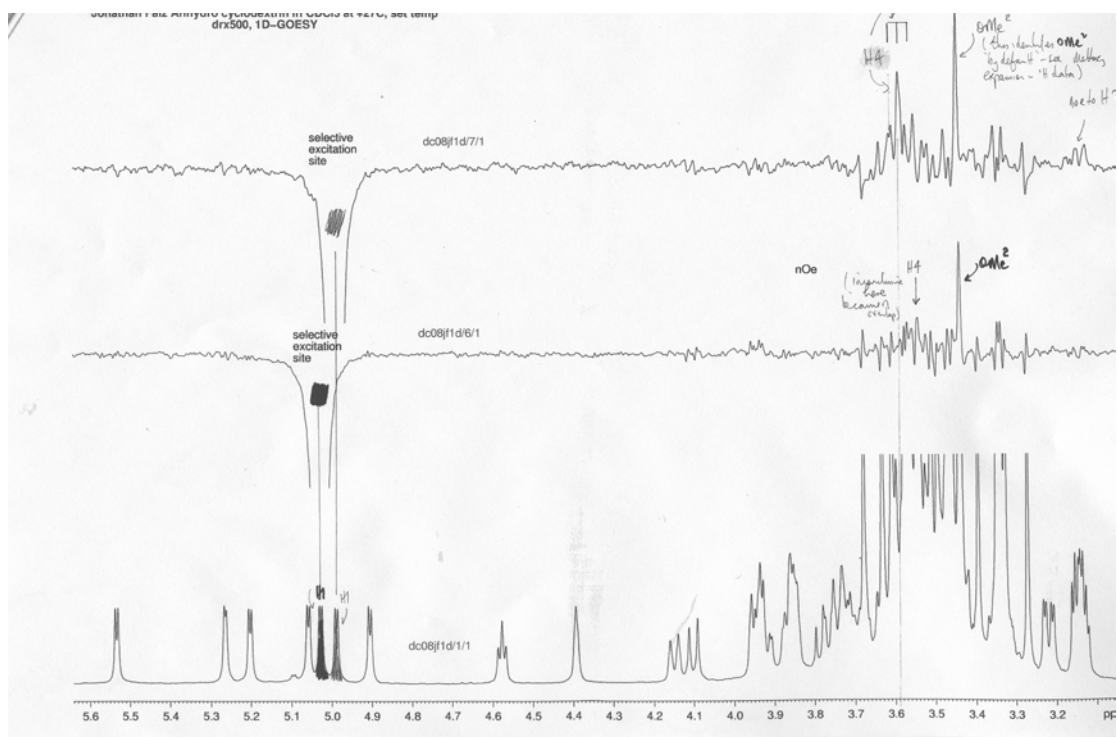

Figure SM7. NOE spectra of **5** (CDCl<sub>3</sub>).

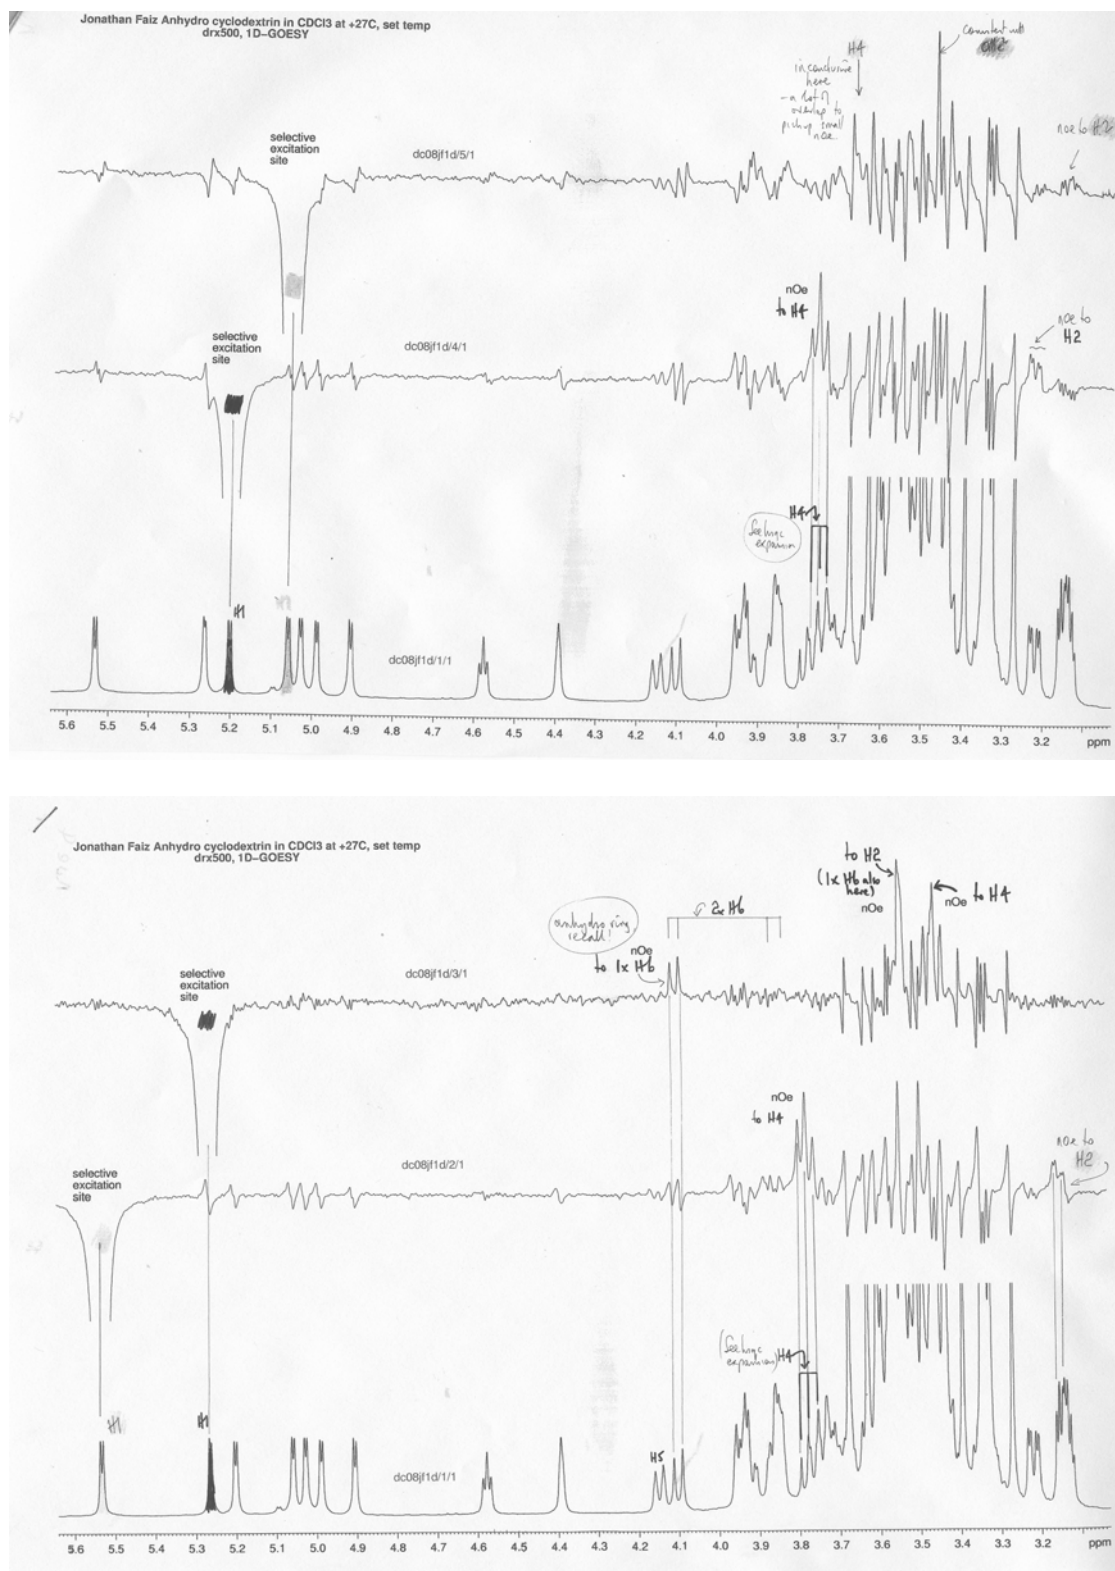

Figure SM8. NOE spectra of **5** (CDCl<sub>3</sub>).



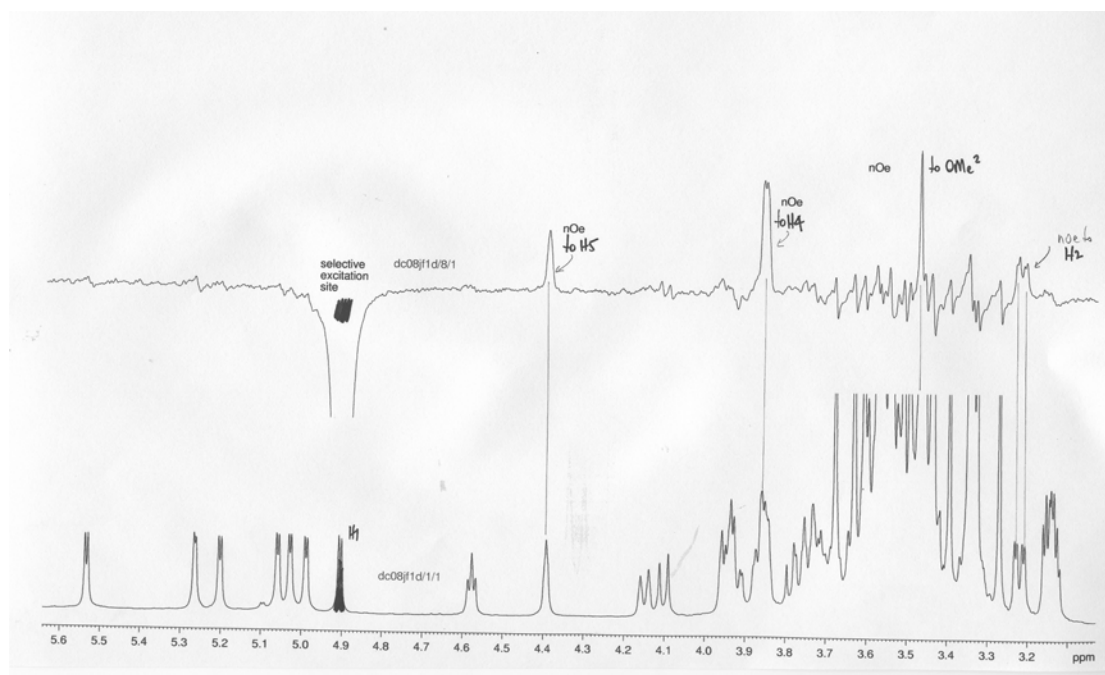

**Figure SM9.** NOE spectra of **5** (CDCl<sub>3</sub>).
