# Supplementary material for: Acetylenic cyclodextrins for multireceptor architectures: cups with sticky ends for the formation of extension wires and junctions
Source: Royal Society of Chemistry journal article supplement (doi:10.1039/b508607h), 2005-01-01
Supplement: b508607h-2.pdf [file b508607h-2.pdf]

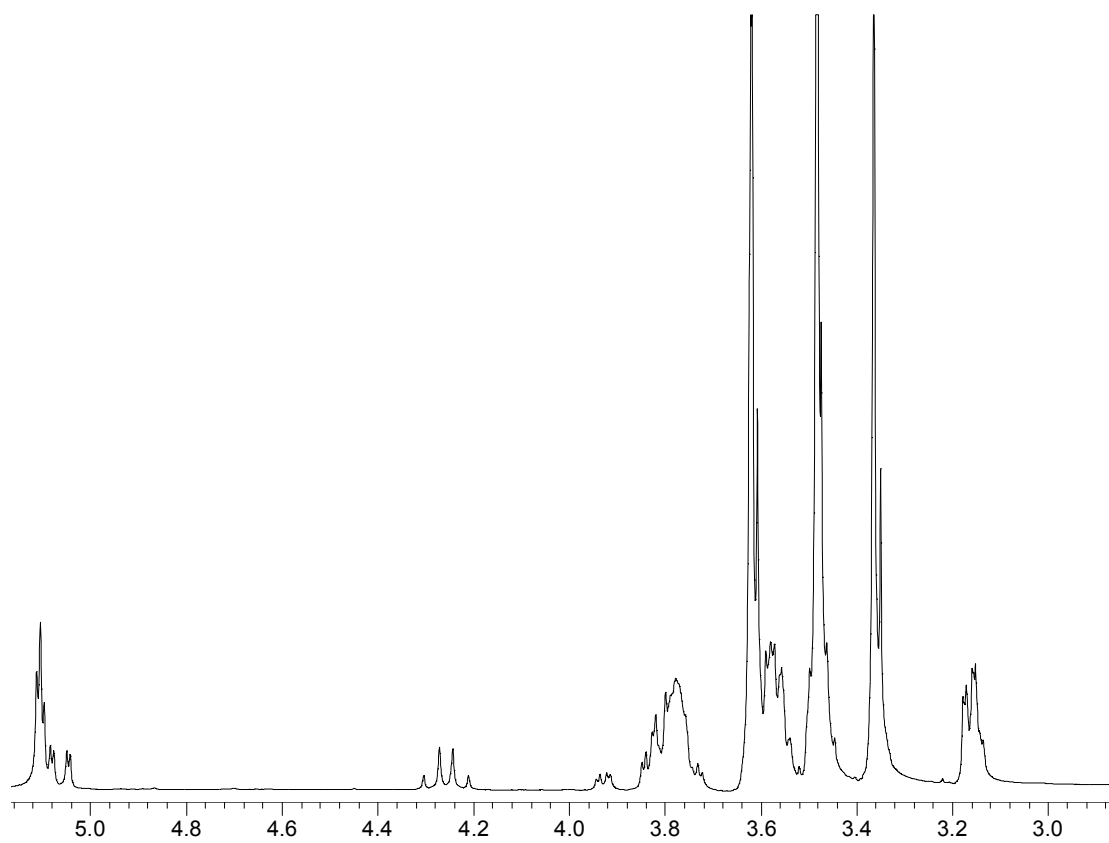

**Figure SM10.** 500 MHz  $^1\text{H}$  NMR spectrum of **6** ( $\text{CDCl}_3$ ).

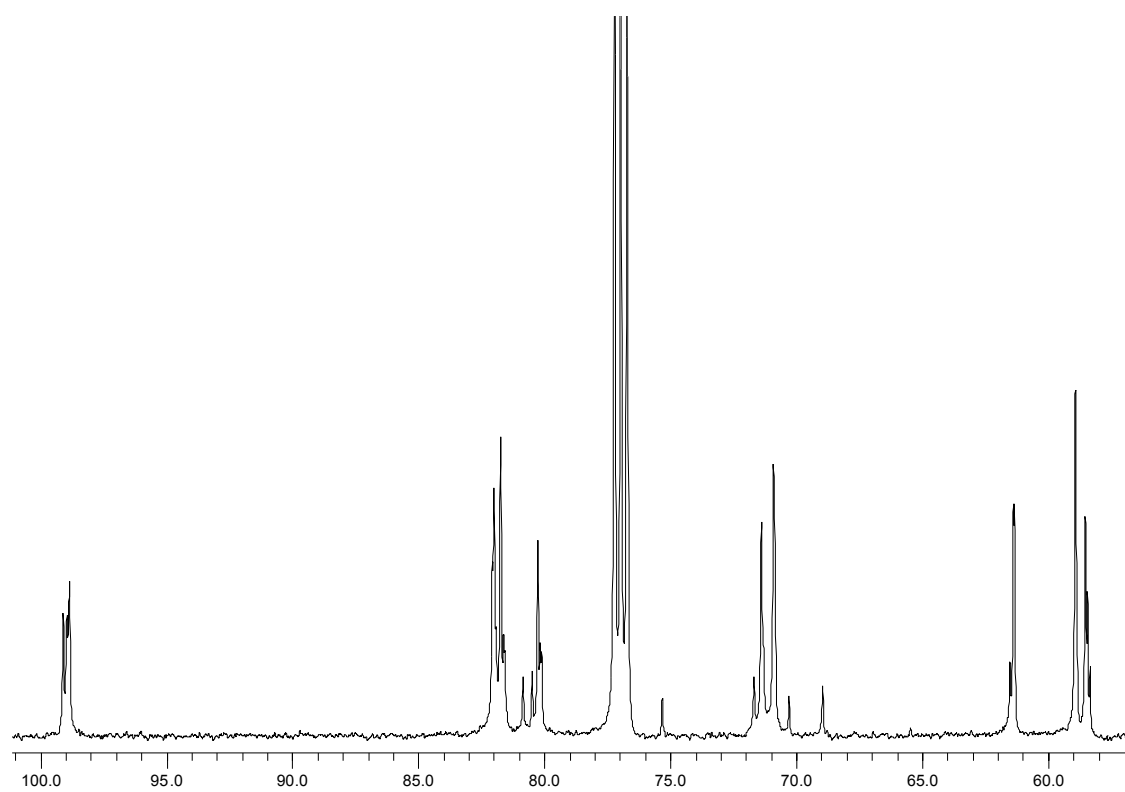

**Figure SM11.** 125 MHz <sup>13</sup>C NMR spectrum of **6** (CDCl<sub>3</sub>).

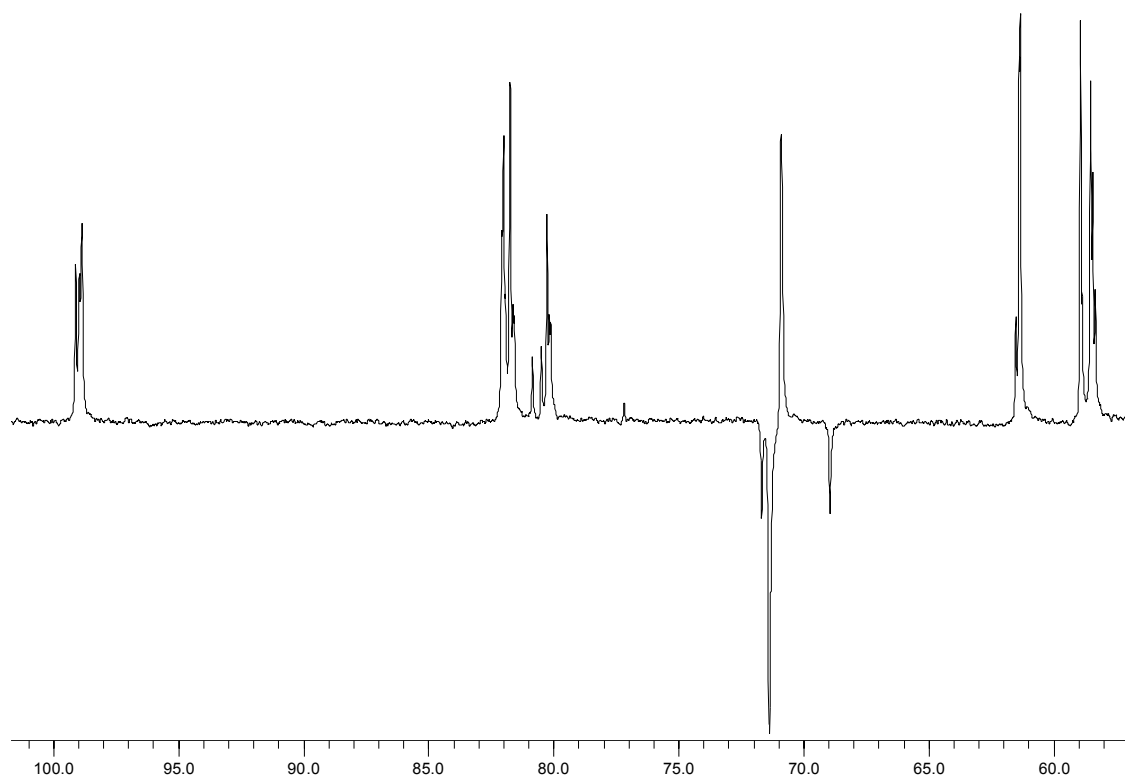

**Figure SM12.** 125 MHz DEPT spectrum of **6** (CDCl<sub>3</sub>).

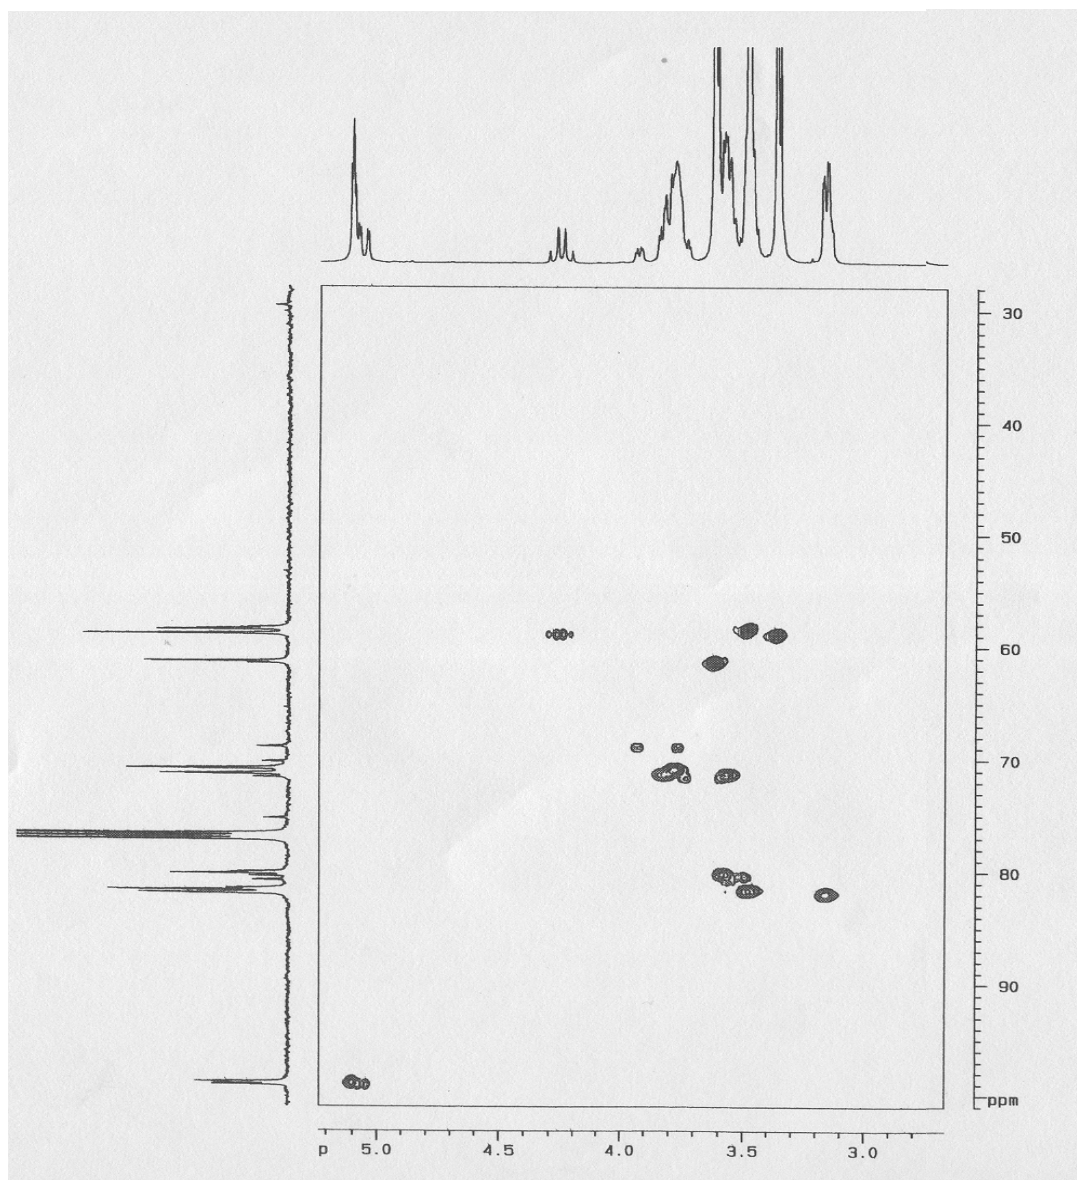

**Figure SM13.** Expanded HSQC spectrum of **6** (CDCl<sub>3</sub>).

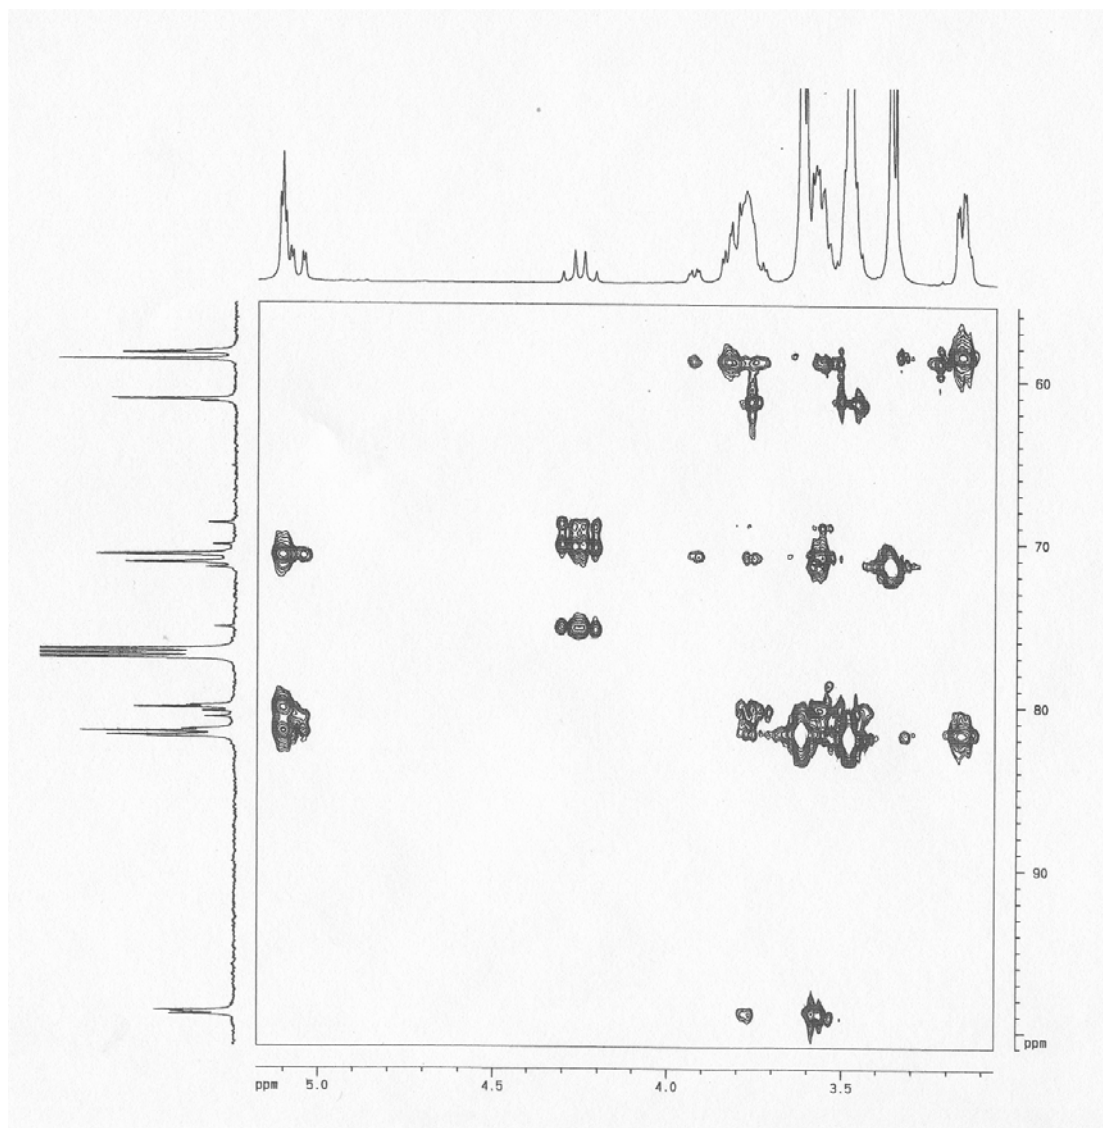

**Figure SM14.** HMBC spectrum of **6** (CDCl<sub>3</sub>).

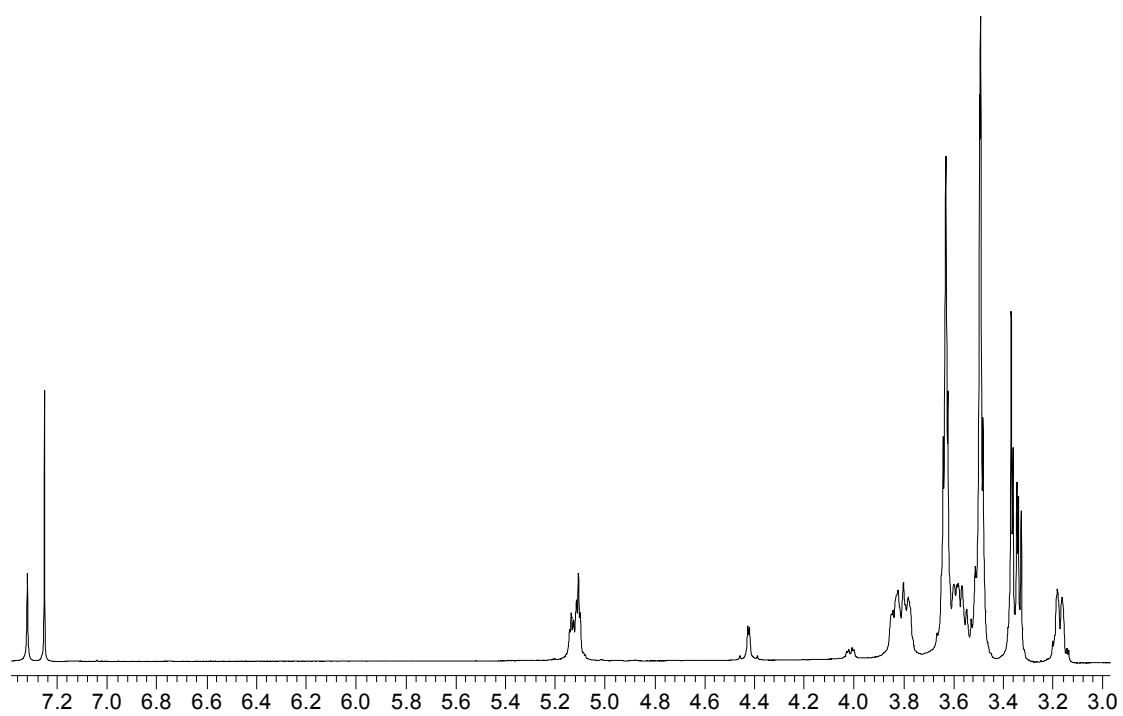

**Figure SM15.** 500 MHz  $^1\text{H}$  NMR of 7 ( $\text{CDCl}_3$ ).

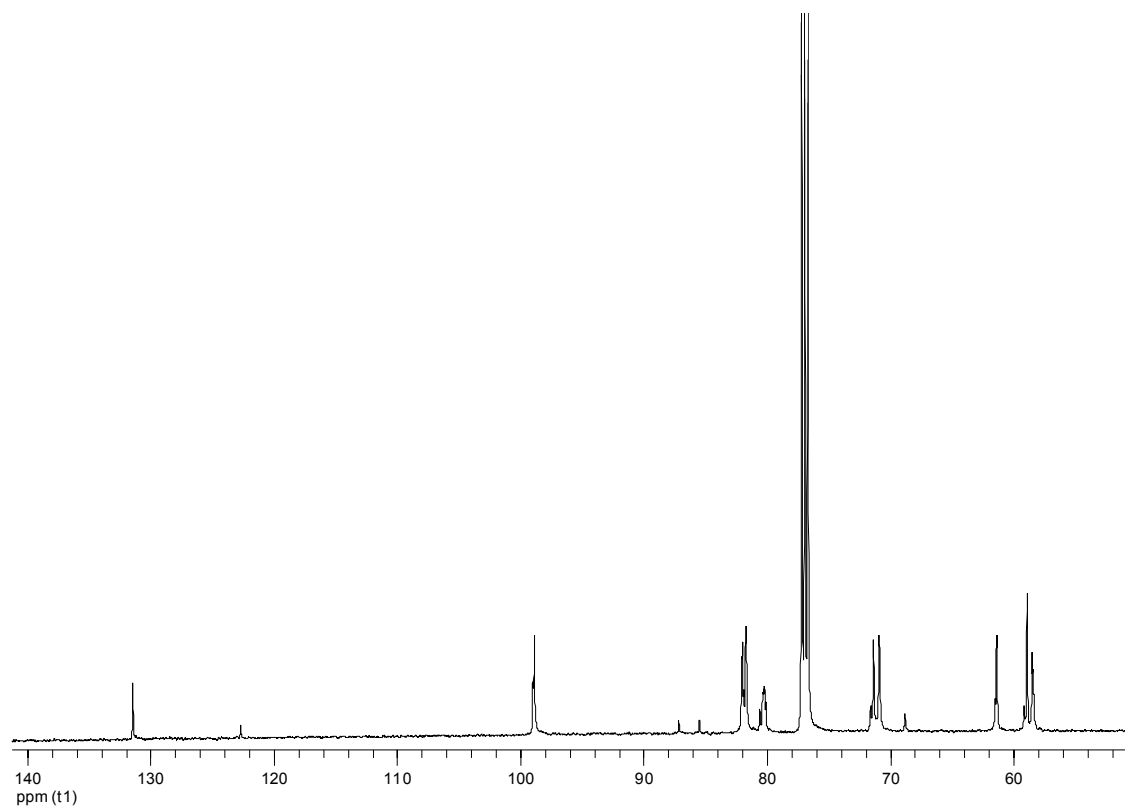

**Figure SM16.** 125 MHz  $^{13}\text{C}$  NMR spectrum of 7 ( $\text{CDCl}_3$ ).

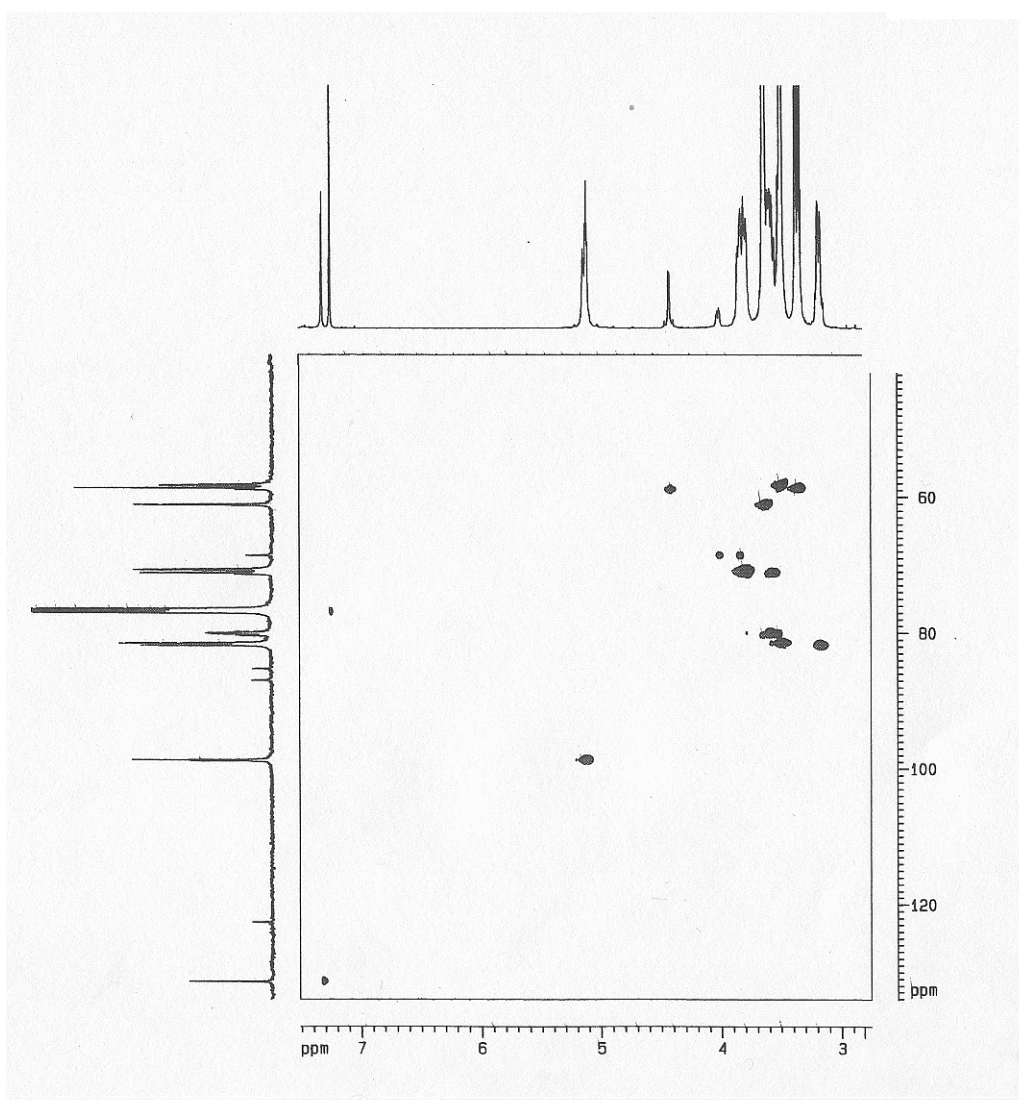

**Figure SM17.** Expanded HSQC spectrum of **7** ( $\text{CDCl}_3$ ).

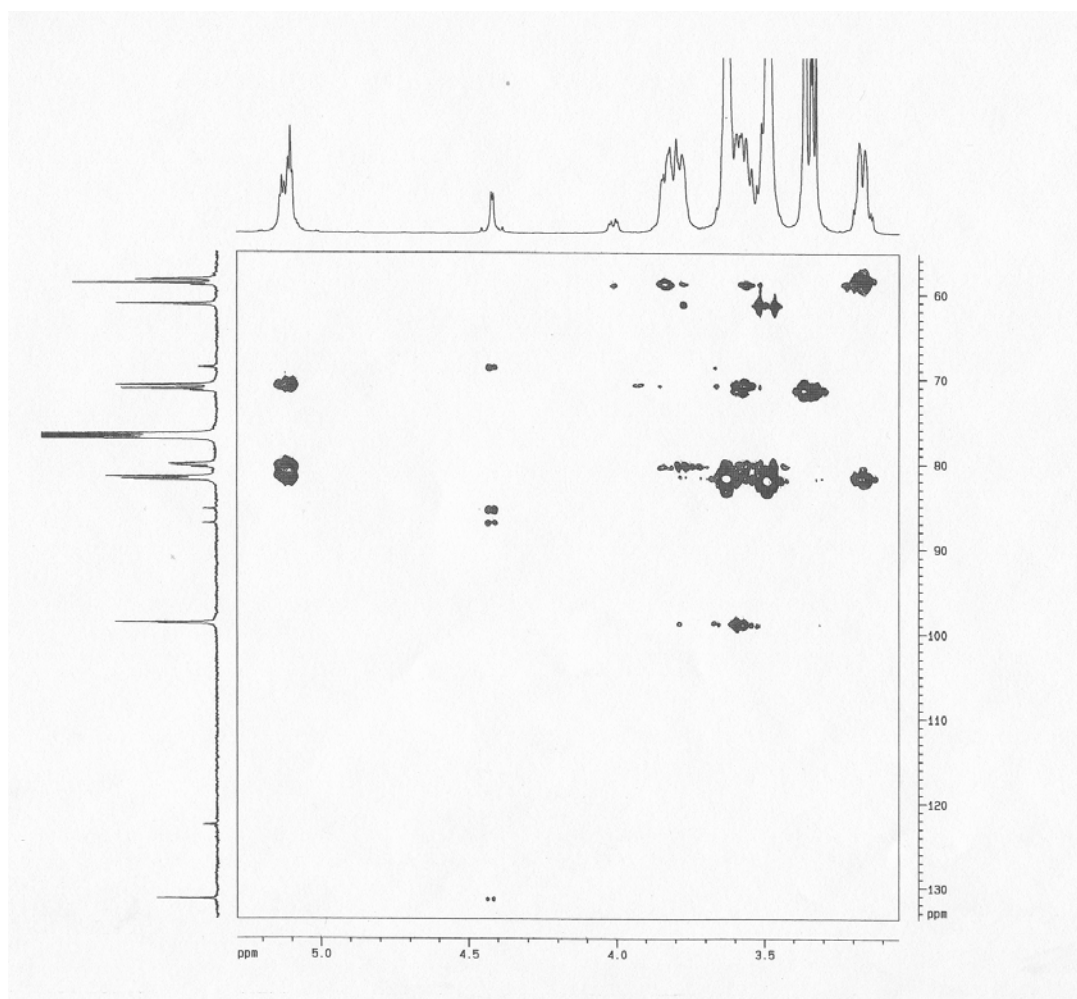

**Figure SM18.** HMBC spectrum of 7 (CDCl<sub>3</sub>).



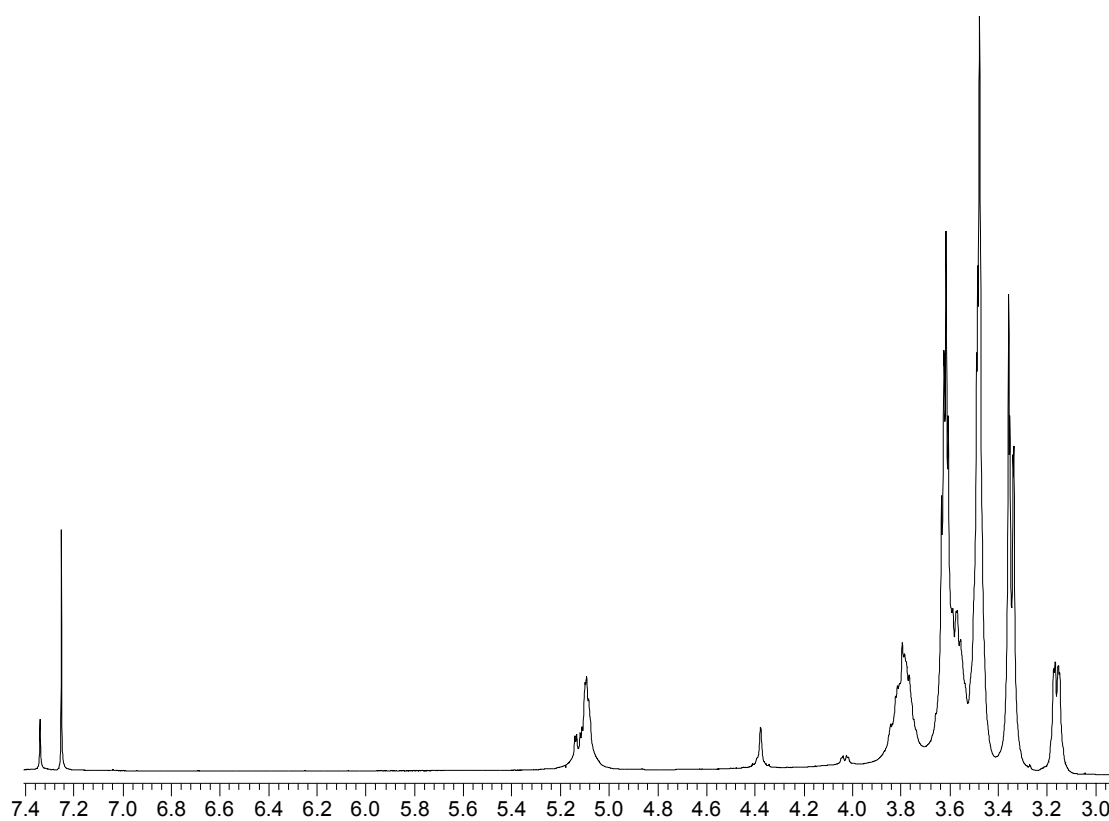

**Figure SM19.** 500 MHz  $^1\text{H}$  NMR spectrum of **8** ( $\text{CDCl}_3$ ).

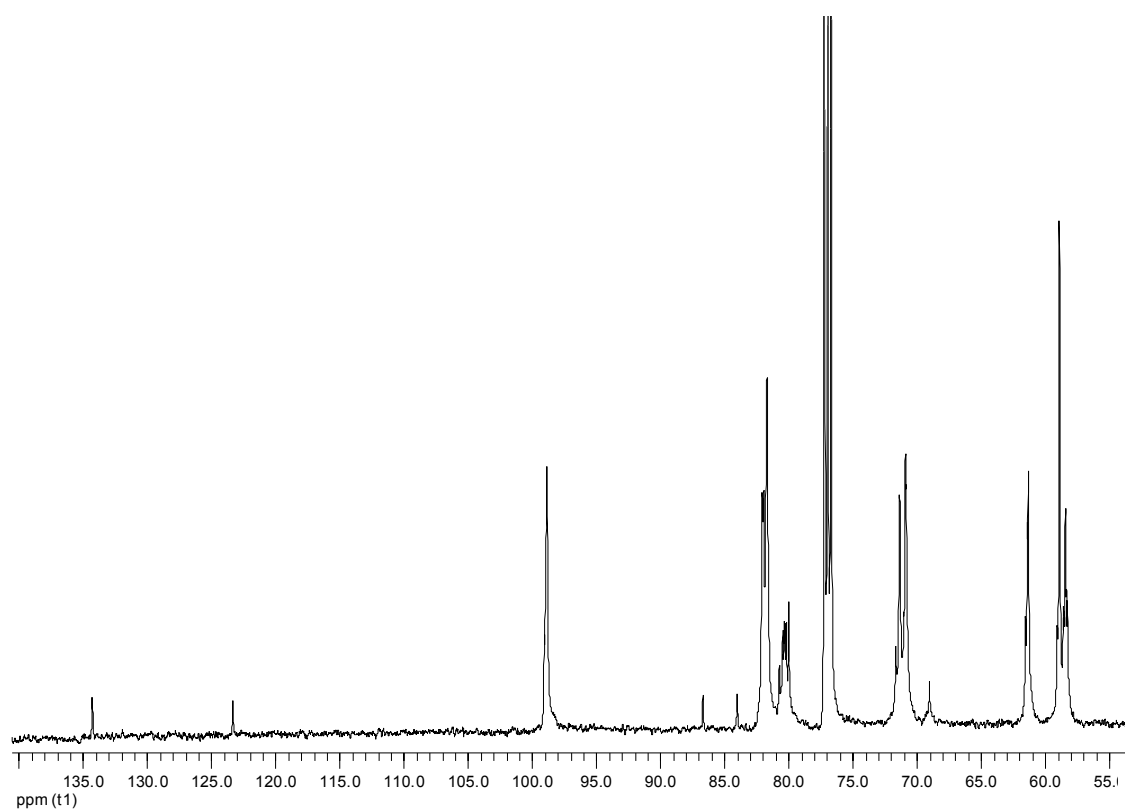

**Figure SM20.** 125 MHz  $^{13}\text{C}$  NMR spectrum of **8** ( $\text{CDCl}_3$ ).

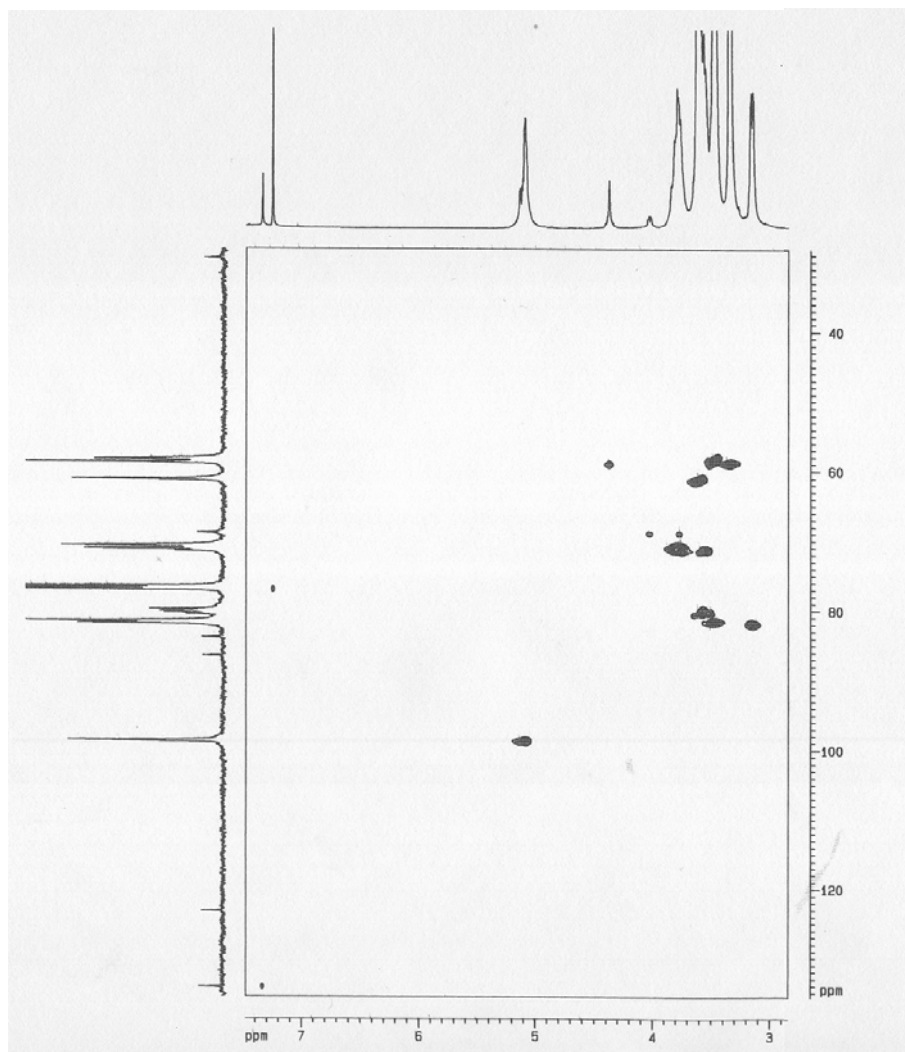

**Figure SM21.** Expanded HSQC spectrum of **8** ( $\text{CDCl}_3$ ).

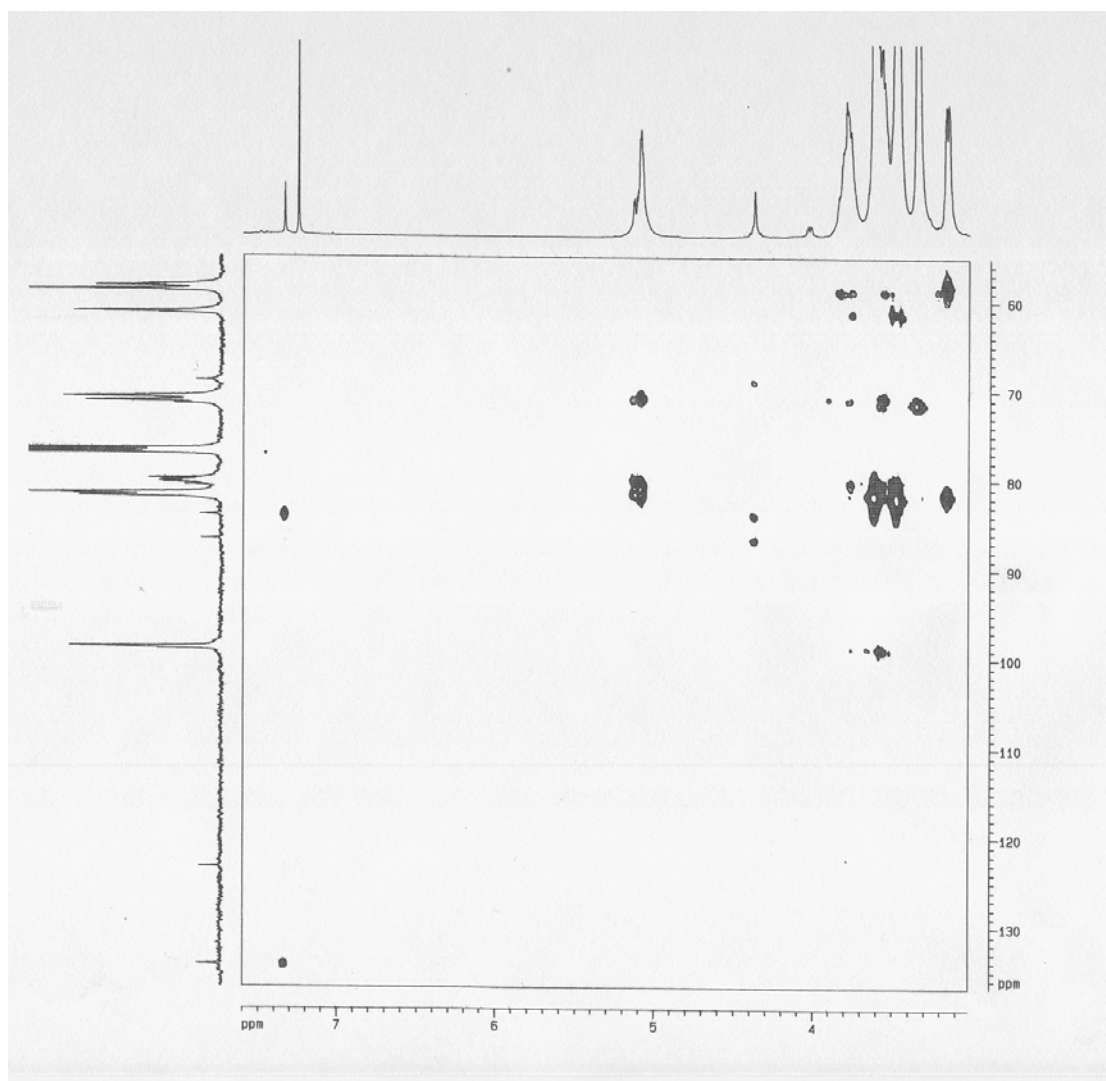

**Figure SM22.** HMBC spectrum of **8** ( $\text{CDCl}_3$ ).
